# PepNN: a deep attention model for the identification of peptide binding sites

Osama Abdin<sup>1</sup>, Han Wen<sup>2</sup>, Philip M. Kim<sup>1,2,3,\*</sup>

1. Department of Molecular Genetics, University of Toronto, Toronto, ON M5S 3E1, Canada
2. Donnelly Centre for Cellular and Biomolecular Research, University of Toronto, Toronto, ON M5S 3E1, Canada
3. Department of Computer Science, University of Toronto, Toronto, ON M5S 3E1, Canada

\* To whom correspondence should be addressed: [pi@kimlab.org](mailto:pi@kimlab.org)

## 1 **Abstract**

2 Protein-peptide interactions play a fundamental role in facilitating many cellular processes, but  
3 remain underexplored experimentally and difficult to model computationally. Here, we introduce  
4 PepNN-Struct and PepNN-Seq, structure and sequence-based approaches for the prediction of  
5 peptide binding sites on a protein given the sequence of a peptide ligand. The models make use  
6 of a novel reciprocal attention module that is able to better reflect biochemical realities of  
7 peptides undergoing conformational changes upon binding. To compensate for the scarcity of  
8 peptide-protein complex structural information, we make use of available protein-protein  
9 complex and protein sequence information through a series of transfer learning steps. PepNN-  
10 Struct achieves state-of-the-art performance on the task of identifying peptide binding sites, with  
11 a ROC AUC of 0.893 and an MCC of 0.483 on an independent test set. Beyond prediction of  
12 binding sites on proteins with a known peptide ligand, we also show that the developed models  
13 make reasonable agnostic predictions, allowing for the identification of novel peptide binding  
14 proteins.

## 15 **Introduction**

16 Interactions between proteins and peptides are critical for a variety of biological  
17 processes. A large fraction of protein-protein interactions are mediated by the binding of  
18 intracellular peptide recognition modules (PRMs) to linear segments in other proteins (Tompa *et al*,  
19 *al*, 2014). Moreover, peptide ligands binding to extracellular receptors have important functions  
20 (Krumm & Grisshammer, 2015). In total, it is estimated that there are roughly  $10^4$  human  
21 proteins that contain at least one PRM (Cunningham *et al*, 2020) and that there are over  $10^6$   
22 peptide motifs encoded in the human proteome (Tompa *et al*, 2014). Disruption of these  
23 interactions and their regulation can consequently result in disease; for instance, many proteins  
24 with PRMs harbor oncogenic mutations (Yang *et al*, 2015). It has also been shown that viral  
25 proteins encode peptidic motifs that can potentially be used to hijack host machinery during  
26 infection (Hagai *et al*, 2014).

27 In the absence of ample experimental data including solved structures, gaining molecular  
28 insight into these interactions and their associated disease states is contingent on the ability to  
29 model peptide binding computationally. This has been a difficult problem that has traditionally  
30 been approached with peptide-protein docking (Ciemny *et al*, 2018). One widely used peptide  
31 docking tool is FlexPepDock, a Rosetta protocol that refines coarse-grain peptide-protein  
32 conformations by sampling from the degrees of freedom within a peptide (Raveh *et al*, 2010). In  
33 general, benchmarking studies have shown that peptide docking approaches often fail to  
34 accurately identify the native complex conformation (London *et al*, 2012; Agrawal *et al*, 2019;  
35 Weng *et al*, 2020), indicating that this problem remains unsolved; current approaches are limited  
36 by the high flexibility of peptides as well the inherent error of scoring heuristics (Ciemny *et al*,  
37 2018). Machine learning approaches provide potential alternatives to docking, as they can

38 sidestep the issue of explicit enumeration of conformational space and can learn scoring metrics  
39 directly from the data.

40 Different machine learning approaches have been applied to the preliminary problem of  
41 predicting the binding sites of peptides with a varying amount of success (Johansson-Åkhe *et al*,  
42 2019; Zhao *et al*, 2018; Taherzadeh *et al*, 2016, 2018; Wardah *et al*, 2020; Iqbal & Hoque,  
43 2018). Deep learning approaches have resulted in large improvements in many area, including in  
44 the domains of protein and structural biology (Senior *et al*, 2020). However, no such model has  
45 been developed for the identification of peptide binding sites; one hurdle has been the paucity of  
46 available data, as deep learning models usually require large training data sets.

47 Here, we sought to develop a novel deep learning architecture to improve upon existing  
48 approaches. In particular, we sought to exploit available protein-protein complex information,  
49 thereby adding an order of magnitude more training data. The "hot segment" paradigm of  
50 protein-protein interaction suggests that the interaction between two proteins can be mediated by  
51 a linear segment in one protein that contributes to the majority of the interface energy (London *et al*  
52 *al*, 2010). Complexes of protein fragments with receptors thus represent a natural source of data  
53 for model pre-training. In addition, the idea of pre-training contextualized language models has  
54 recently been adapted to protein biology for the purpose of generating meaningful  
55 representations of protein sequences (Elnaggar *et al*, 2020; Rao *et al*, 2019). The success of these  
56 approaches provides an opportunity to develop a strictly sequence based peptide binding site  
57 predictor.

58 In this study, we integrate the use of contextualized-language models, available protein-  
59 protein complex data, and a task-specific attention-based architecture, to develop parallel models  
60 for both structure and sequence-based peptide binding site prediction: PepNN-Struct and

61 PepNN-Seq. Comparison to existing approaches reveals that our models perform better in most  
62 cases. We also show that the developed models can make reasonable peptide agnostic  
63 predictions, allowing for their use for the identification of novel peptide binding sites.

## 64 **Results**

### 65 **Parallel models for structure and sequence-based peptide binding site prediction**

66 We sought to develop a network that takes as input a representation of a protein as well  
67 as a peptide sequence, and outputs residue-wise scores representing the confidence that a  
68 particular residue is part of a peptide binding site (Fig 1A-B). The PepNN architecture is based  
69 in part on the Transformer, a model that makes use of repeated multi-head attention modules to  
70 efficiently learn long-range dependencies in sequence inputs (Vaswani *et al*, 2017). The  
71 Transformer architecture has also been adapted to graph inputs (Ingraham *et al*, 2019); graph  
72 convolutions have been shown to be effective for protein design (Strokach *et al*, 2020). PepNN-  
73 Struct makes use of these graph attention layers to learn from context within an input protein  
74 (Fig 1A). PepNN-Seq, on the other hand, generates predictions based solely on the input protein  
75 and peptide sequences (Fig 1B).

76 PepNN differs from conventional Transformers in that it does not follow an encoder-  
77 decoder architecture. This is based on the fact encoding the peptide sequence independently  
78 would implicitly assume that all information about the peptide is contained within its sequence.  
79 This assumption is not concordant with the fact that many disordered regions undergo  
80 conformational changes upon protein binding (Mohan *et al*, 2006). A peptide's sequence is thus  
81 insufficient by itself to determine its conformation in a particular system. As an alternative, we  
82 introduced multi-head reciprocal attention layers, a novel attention-based module that  
83 simultaneously updates the peptide and protein embeddings while ensuring that the

84 unnormalized attention values from protein to peptide residues are equal to the unnormalized  
85 attention values in the other direction. This ensures that the protein residues involved in binding  
86 have influence on the peptide residues and vice versa, better reflecting the physical reality of the  
87 peptide-protein binding process. The exact model hyperparameters were determined using  
88 random search (see Methods) and we compared the performance of the model to a graph  
89 Transformer with the same hyperparameters on the preliminary task of identifying the binding  
90 sites of protein fragments. We found that the reciprocal attention variant outperforms the graph  
91 Transformer in its capacity to accurately identify fragment binding sites (Fig S1).

## 92 **Transfer learning results in large improvements in model performance**

93 We used transfer learning in two ways to improve model performance. The first was to  
94 pretrain the model on a large protein fragment-protein complex dataset before fine-tuning with a  
95 smaller dataset of peptide-protein complexes (Fig 1C). To generate the fragment dataset, we  
96 scanned all protein-protein complex interfaces in the PDB with the PeptiDerive Rosetta protocol  
97 (Sedan *et al*, 2016) to identify protein fragments of length 5-25 amino acids that contribute to a  
98 large portion of the complex interface energy (Fig S2). These fragment-protein complexes were  
99 filtered based on their estimated interface energy as well as the buried surface area to ensure that  
100 they had binding properties that were reasonably close to that of peptide-protein complexes. The  
101 second application of transfer learning was the use a pre-trained contextualized language model,  
102 ProtBert (Elnaggar *et al*, 2020), to embed protein sequences. These high dimensional,  
103 information-rich, embeddings were used as input to PepNN-Seq (Fig 1B).

104 To evaluate the impact of transfer learning on model performance, we trained PepNN-  
105 Struct and PepNN-Seq using different procedures. Pre-training PepNN-Struct resulted in  
106 significant improvement over models trained on only the fragment or peptide complex dataset,

107 both in terms of over all binding residue prediction, and in terms of prediction for individual  
108 proteins (Fig 2A, B). Model predictions on the Bro domain of HD-PTP demonstrate this  
109 difference in performance, as only the pre-trained variant of the model correctly predicts the  
110 peptide binding site (Fig 2C). This example furthermore illustrates that the pre-training step  
111 helps bring the parameters closer to an optimum for general peptide binding site prediction,  
112 rather than improving performance solely on examples that match patterns seen in the fragment-  
113 complex dataset.

114 Embedding protein sequences with ProtBert resulted in large performance improvements  
115 over learned embedding parameters for PepNN-Seq (Fig 2D, E). Interestingly, pretraining on the  
116 fragment complexes did not have a large impact on PepNN-Seq performance (Fig 2B, D). This  
117 may suggest that pre-training on the fragment complexes allows PepNN-Struct to learn  
118 reasonable protein embeddings while the use of a pre-trained contextualized language model is  
119 sufficient for the generation of reasonable embeddings in the case of PepNN-Seq.

## 120 **PepNN achieves state-of-the-art performance on peptide binding site prediction**

121 We initially evaluated the developed models on an independent test set derived from the  
122 peptide complex dataset. Unsurprisingly, we found that PepNN-Struct outperforms PepNN-Seq  
123 (Table 1). We additionally ran the sequence-based PBRpredict-Suite model on this test dataset  
124 (Iqbal & Hoque, 2018). All three variants of this model performed worse than PepNN on this  
125 dataset (Table 1) and notably, the observed performance was drastically lower than the  
126 performance reported in the original publication. This could potentially be due to the fact a  
127 smoothing approach was used to annotate binding sites in the PBRpredict-Suite study (Iqbal &  
128 Hoque, 2018), while binding site residues annotations were made based only on distance to  
129 peptide residues in this study.

130 Most other existing approaches lack programmatic access and a portion rely on  
131 alignments to reference datasets that overlap with the test set. We hence used values reported in  
132 the literature for comparison. To ensure an unbiased comparison, the model was re-trained on the  
133 training datasets used in different studies prior to comparison on their test sets. In all cases,  
134 PepNN-Struct largely outperforms existing approaches in terms of ROC AUC (Table 1). In most  
135 cases, PepNN-Seq also outperforms existing approaches by this metric. PepNN does, however,  
136 perform worse in terms of MCC in a couple of cases, suggesting that there exist thresholds at  
137 which the models do not perform as well as the PepBind approach, despite having more robust  
138 performance at different prediction thresholds. It is worth noting that the training datasets used in  
139 other studies were substantially smaller and thus training on them resulted in lower performance  
140 of our models overall (Table 1). This was both due to the fact that the datasets used in other  
141 studies are relatively outdated and that a larger portion of the available data was used for testing.

### 142 **Peptide-agnostic prediction allows the identification of putative novel peptide binding** 143 **proteins**

144 To quantify the extent to which the model relies on information from the protein when  
145 making predictions, we tested the ability of PepNN-Struct and PepNN-Seq to predict peptide  
146 binding sites using random length poly-glycine peptides as input sequences. While the models  
147 did perform better when given the native peptide sequence than with a poly-glycine sequence (p-  
148 value  $< 2.2e-16$  for both PepNN-Struct and PepNN-Seq, DeLong test), there was only a small  
149 overall decrease in the ROC AUC when a poly-glycine was given (Fig 3A, B). Comparing the  
150 probabilities that the model assigns to different residues shows that in both the case of PepNN-  
151 Struct and PepNN-Seq, providing the native peptide increases the model's confidence when  
152 predicting binding residues (Fig S3). Providing the native peptide sequence is thus more



153 important for reducing false negatives. Overall, these results suggest that while providing a  
154 known peptide can increase model accuracy, the model can make reasonable peptide-agnostic  
155 predictions and could potentially be used to identify novel peptide binders.

156 To quantify the model's confidence that a protein is a peptide-binding module, we  
157 generated a score that takes into account the binding probabilities that the model assigns the  
158 residues in the protein, as well as the percentage of residues that the model predicts are binding  
159 residues with high confidence. To compute this score, a Gaussian distribution was fit to the  
160 distribution of binding residue percentages in each protein from the training dataset (Fig S4A).  
161 The resulting score was the weighted average of the top  $n$  residue probabilities and the likelihood  
162 that a binding site would be composed of those  $n$  residues based on the aforementioned  
163 Gaussian. For each protein,  $n$  was chosen to maximize the score. As done in a previous study  
164 (Johansson-Åkhe *et al*, 2019), the weight assigned to each component of the score was chosen to  
165 maximize the correlation between the MCC of the prediction for each protein in the validation  
166 dataset, and its score (Fig S4B,C). This was motivated by the fact that the confidence of the  
167 model should correlate with its correctness.

168 We used the models to predict binding sites for domains in every unique chain in the  
169 PDB not within 30% homology of a sequence in the training dataset and domains in every  
170 sequence in the reference human proteome from UniProt (Consortium, 2018), not within 30%  
171 homology of a sequence in the training dataset. Domains were extracted by assigning PFAM  
172 (Finn *et al*, 2013) annotations using InterProScan (Jones *et al*, 2014) (Table S1, S2). To assess  
173 the capacity of the models to discriminate between peptide binding modules and other domains,  
174 we compared the distribution of scores for canonical PRMs to that of other proteins. Previously  
175 defined modular protein domains (Jadwin *et al*, 2012), and peptide binding domains

176 (Cunningham *et al*, 2020) were considered canonical PRMs. In both the case of the PDB and the  
177 human proteome, the distribution of scores for canonical PRMs was higher than the background  
178 distribution (Fig 3C, D).

179 In total, PepNN-Struct assigns 39 623 domains in the PDB a score higher than the mean  
180 PRM score and PepNN-Seq assigns 10 332 domains in the human proteome a score higher than  
181 the mean PRM score. Analysis of the distribution of scores for different domains reveals that  
182 many DNA binding domains, including different transcription factors and DNA modifying  
183 enzymes, were assigned low scores on average by PepNN (Table S3, S4). This indicates that  
184 PepNN has the capacity to discriminate between different types of binding sites. There are,  
185 nonetheless, some nucleic acid binding domains with high scores (Table S3, S4) suggesting that  
186 there are false positives and that downstream computational and experimental work is required to  
187 validate putative peptide binding sites.

188 One domain identified by PepNN-Struct is the sterile alpha motif (SAM) domain of the  
189 Deleted-in-liver cancer 1 (DLC1) protein (Table S1). This domain was recently shown to be a  
190 peptide binding module (Joshi *et al*, 2020), demonstrating the capacity of the model to identify  
191 novel peptide binders. Another interesting hit identified using PepNN-Struct is the ORF7a  
192 accessory protein from the SARS-Cov-2 virus (Table S1). The model predicts that this protein  
193 has a peptide binding site located between two beta-sheets at the N-terminal end of the protein  
194 (Fig 4A). Validating this peptide binding site involves identifying a binding peptide and showing  
195 that the residues that comprise the binding site are necessary for the interaction. The ORF7a  
196 homolog from SARS-Cov has been shown to bind the ectodomain of the human BST-2 protein  
197 (Taylor *et al*, 2015). BST-2 binds and tethers viral particles to the cell membrane, thereby  
198 preventing viral exit (Taylor *et al*, 2015). It was shown that by binding BST-2, ORF7a prevents

199 its glycosylation and thus reduces its ability to inhibit viral exit (Taylor *et al*, 2015). Given the  
200 fact that BST-2 forms a coiled-coil structure, it is possible that a linear segment along one of its  
201 helices binds to ORF7a at the predicted peptide-binding pocket.

202 As a preliminary, unbiased, test of this prediction, we performed global docking of BST-  
203 2 onto ORF7a using the ClusPro webserver (Kozakov *et al*, 2017; Vajda *et al*, 2017). In seven  
204 of the top ten poses, BST-2 was found to interact with ORF7a at the predicted binding site. In  
205 four of these poses, the N70 residue on BST-2, a known glycosylation site (Wollscheid *et al*,  
206 2009), was completely buried. To validate these docking results, those four systems were subject  
207 to short, 50 ns, MD simulations. ORF7a was stably bound to BST-2 in one of the four systems.  
208 To better evaluate this putative binding conformation at a longer time scale, a truncated system  
209 was built and it was subjected to three simulations of at least 200 ns. ORF7a remained bound to  
210 BST-2 throughout the different trajectories (Fig 4B), and hydrogen bond analysis showed that  
211 several charged/polar sidechains at the interface contribute to the majority of the binding affinity  
212 (Fig 4C).

### 213 **Application of PepNN to epitope prediction**

214 The binding of antibodies to their target antigens is largely facilitated by a set of variable  
215 segments known as complementarity-determining regions (CDRs). It has been shown that  
216 synthetic peptides derived from the sequences of these CDRs can bind the target antigen of the  
217 antibody from which they were derived (Williams *et al*, 1991, 1988; Taub *et al*, 1989). We thus  
218 re-trained PepNN to predict the binding sites of different CDRs given an antigen structure. The  
219 estimated interface energy of peptide-protein complexes is greater than that of CDR-protein  
220 complexes (Fig S5). The pre-training dataset was consequently remade with less stringent  
221 thresholds (see Methods). We also ensured that fragments forming helix or strand secondary

222 structures were filtered from the pre-training dataset. We trained the model to predict binding  
223 sites given H1, H2, and H3 loops. To generate a full epitope prediction, we assigned each residue  
224 the maximum score from the three models. Overall, the observed performance was worse than  
225 that on peptide binding site prediction (Fig S6A). Nevertheless, the model makes reasonable  
226 predictions on numerous test antigens (Fig S6B).

## 227 **Discussion**

228         We have developed parallel structure and sequence-based models for the prediction of  
229 peptide binding sites. These models, PepNN-Struct and PepNN-Seq, make use of a novel  
230 attention-based deep learning module that is integrated with transfer learning to compensate for  
231 the scarcity of peptide-protein complex data. Comparison to existing approaches shows that  
232 PepNN achieves state-of-the-art on the task of identifying peptide binding sites. In addition,  
233 unlike previously developed approaches, PepNN does not rely on structural or sequence  
234 alignments and is thus not dependent on the presence of structural data for homologs. Given the  
235 success of this approach, PepNN can be incorporated into local docking pipelines in order to  
236 facilitate the generation of protein-peptide complex models, a necessary step in delineating the  
237 molecular mechanisms underlying many cellular processes.

238         We furthermore demonstrated that PepNN can make accurate peptide-agnostic  
239 predictions. This observation is concordant with recent work that has suggested that a protein's  
240 surface contains the majority of information regarding its capacity for biomolecular interactions  
241 (Gainza *et al*, 2020). Other approaches, trained on negative binding data, are better suited than  
242 PepNN to discriminate between identified binding peptides (Lei *et al*, 2020; Cunningham *et al*,  
243 2020). By contrast, PepNN can uniquely be used to score proteins lacking a known peptide  
244 ligand to predict their ability to bind peptides. Running this procedure on all proteins in the PDB

245 and the reference human proteome revealed a number of putative novel peptide recognition  
246 modules, suggesting that a large portion of the space of PRMs has yet to be characterized. As a  
247 demonstration of the model's capacity to identify novel peptide binders, we performed MD  
248 simulations on putative ORF7a/BST-2 complexes, suggesting that the former protein can  
249 potentially bind a linear fragment of BST-2 at a predicted peptide binding site. The observation  
250 that PepNN can make predictions in the absence of a known peptide binder can also be used to  
251 discern regions of proteins that can be readily targeted by peptides. PepNN predictions can thus  
252 be used to inform the application of high-throughput experimental approaches to different  
253 proteins for the purpose of identifying therapeutic peptides.

## 254 **Materials and Methods**

### 255 **Datasets**

256 A dataset of protein-peptide complexes was generated by filtering complexes in the PDB.  
257 Crystal structures with a resolution of at least 2.5 Å that contain a chain of at least 50 amino  
258 acids in complex with a chain of 25 or less amino acids were considered putative peptide-protein  
259 complexes. Using FreeSASA (Mitternacht, 2016), complexes with a buried surface area of less  
260 than 400 Å<sup>2</sup> were filtered out, leaving 3046 complexes. The sequences of the receptors in the  
261 remaining complexes were clustered at a 30% identity threshold using PSI-CD-HIT (Fu *et al*,  
262 2012), and the resulting clusters were divided into training, validation, and test sets at  
263 proportions of 80%, 10% and 10% respectively. The test set contains 305 examples and is  
264 referred to as TS305.

265 A similar process was used to generate a dataset of protein fragment-protein complexes.  
266 Using the PeptiDerive Rosetta protocol (Sedan *et al*, 2016), the PDB was scanned for protein  
267 fragments of length 5-25 amino acids with a high predicted interface energy when in complex

268 with another chain of at least 50 amino acids. Complexes were filtered out based on the  
269 distribution of predicted interface energies from the dataset of real protein-peptide complexes.  
270 Only complexes with an interface score less than one standard deviation above the mean of the  
271 peptide-protein complex distribution were maintained. The complexes were also filtered by  
272 buried surface area. Complexes with less than 400 Å<sup>2</sup> were once again filtered out. The final  
273 dataset contained 406 365 complexes. For data splitting, complexes were again clustered at 30%  
274 identity. In both datasets, binding residues were defined as those residues in the protein receptor  
275 with a heavy atom within 6 Å<sup>2</sup> from a heavy atom in the interacting chain.

276 In addition to TS305, the models were also tested on benchmark datasets compiled in  
277 other studies. This includes the test dataset used to evaluate the Interpep approach (Johansson-  
278 Åkhe *et al*, 2019) (TS251), the test dataset used to evaluate the PepBind approach (Zhao *et al*,  
279 2018) (TS639), and the test dataset used to evaluate SPRINT-Str (Taherzadeh *et al*, 2017)  
280 (TS125).

281 Complexes from the non-redundant SAbDab dataset were used for training the model to  
282 predict epitopes (Dunbar *et al*, 2014). CDRs were defined using the PyIgClassify dataset (Adolf-  
283 Bryfogle *et al*, 2015). Complexes where a particular CDR was not in contact with the antigen  
284 were filtered out when training the model to predict the binding site of that CDR. Antigen  
285 sequences were clustered at 30% identity before splitting the dataset. For pre-training on  
286 fragment-protein complexes, less stringent thresholds of a Rosetta interface score of -10 and a  
287 buried surface area of 250 Å<sup>2</sup> were used for filtering. In addition, secondary structure annotations  
288 were assigned to each fragment in the dataset using the MDTraj software (McGibbon *et al*,  
289 2015), and any fragment with more than two residues in the helix or strand classes were filtered  
290 out. The resulting dataset contained 684 912 entries.

## 291 **Input representation**

292 In the case of PepNN-Struct, input protein structures are encoded using a previously  
293 described graph representation (Ingraham *et al*, 2019), with the exception that additional node  
294 features are added to encode the side chain conformation at each residue. In this representation, a  
295 local coordinate system is defined at each residue based on the relative position of the C $\alpha$  to the  
296 other backbone atoms (Ingraham *et al*, 2019). The edges between residues encode information  
297 about the distance between the residues, the relative direction from one C $\alpha$  to another, a  
298 quaternion representation of the rotation matrix between the local coordinate systems, and an  
299 embedding of the relative positions of the residues in the protein sequence (Ingraham *et al*,  
300 2019). The nodes include a one-hot representation of the amino acid identity and the torsional  
301 backbone angles (Ingraham *et al*, 2019).

302 To encode information about the side-chain conformation, the centroid of the heavy side  
303 chain atoms at each residue is calculated. The direction of the atom centroid from the C $\alpha$  is  
304 represented using a unit vector based on the defined local coordinate system. The distance is  
305 encoded using a radial basis function, similar to the encoding used for inter-residue distances in  
306 the aforementioned graph representation (Ingraham *et al*, 2019). A one-hot encoding is used to  
307 represent protein and peptide sequence information. The pre-trained contextualized language  
308 model, ProtBert (Elnaggar *et al*, 2020), is used to embed the protein sequence in PepNN-Seq.

## 309 **Model architecture**

310 The developed architecture takes inspiration the original Transformer architecture  
311 (Vaswani *et al*, 2017), as well the Structured Transformer, developed for the design of proteins  
312 with a designated input structure (Ingraham *et al*, 2019). Like these models, the PepNN  
313 architecture consists of repeating attention and feed forward layers (Fig 1A). PepNN differs from

314 conventional Transformers, however, in that does not follow an encoder-decoder attention  
315 architecture and it makes use of multi-head reciprocal attention. This is a novel attention-based  
316 module that shares some conceptual similarity to a layer that was recently used for salient object  
317 detection (Xia *et al*, 2019). Conventional scaled dot attention, mapping queries, represented by  
318 matrix  $Q$ , and key-value pairs, represented by matrices  $K$  and  $V$ , to attention values takes the  
319 following form (Vaswani *et al*, 2017):

$$320 \quad \text{Attention}(Q, K, V) = \text{softmax}\left(\frac{QK^T}{\sqrt{d_k}}\right)V$$

321 In reciprocal attention modules, protein residue embeddings are projected to a query matrix,  $Q \in$   
322  $\mathbb{R}^{n \times d_k}$  and a value matrix,  $V_{\text{prot}} \in \mathbb{R}^{n \times d_v}$ , where  $n$  is the number of protein residues. Similarly,  
323 the peptide residue embeddings are projected a key matrix,  $K \in \mathbb{R}^{m \times d_k}$ , and a value matrix,  
324  $V_{\text{pep}} \in \mathbb{R}^{m \times d_v}$ , where  $m$  is the number of peptide residues. The resulting attention values are as  
325 follows:

$$326 \quad \text{Attention}_{\text{prot}}(Q, K, V_{\text{pep}}) = \text{softmax}\left(\frac{QK^T}{\sqrt{d_k}}\right)V_{\text{pep}}$$

$$327 \quad \text{Attention}_{\text{pep}}(Q, K, V_{\text{prot}}) = \text{softmax}\left(\frac{KQ^T}{\sqrt{d_k}}\right)V_{\text{prot}}$$

328 Projecting the residue encodings multiple times and concatenating the resulting attention values  
329 allows extension to multiple heads, as described previously (Vaswani *et al*, 2017). The overall  
330 model architecture includes alternating self-attention and reciprocal attention layers, with a final  
331 set of layers to project the protein residue embedding down to a residue-wise probability score  
332 (Fig 1A). For the purpose of regularization, dropout layers were included after each attention  
333 layer.



334 Model hyperparameters were tuned using random search to optimize the cross-entropy  
335 loss on the fragment complex validation dataset. Specifically, eight hyperparameters were tuned;  
336  $d_{model}$  (the model embedding dimension),  $d_i$  (the dimension of the hidden layer in the feed  
337 forward layers),  $d_k$ ,  $d_v$ , the dropout percentage, the number of repetitions of the reciprocal  
338 attention module, the number of heads in each attention layer, and the learning rate. In total, 100  
339 random hyperparameter trials were attempted.  $d_{model}$  was set to 64,  $d_i$  was set to 64,  $d_k$  was set  
340 to 64,  $d_v$  was set to 128, dropout percentage was set to 0.2, the number of repetitions of the  
341 reciprocal attention module was set to 6, and each multi-head attention layer was composed of 6  
342 heads.

### 343 **Training**

344 Training was done using an Adam optimizer with a learning rate of 1e-4. A weighted  
345 cross-entropy loss was optimized to take into account the fact that the training dataset is skewed  
346 towards non-binding residues. In both the pre-training step with the fragment complex dataset  
347 and the training with the peptide complex dataset, early stopping was done based on the  
348 validation loss. Training was at most 500 000 iterations during the pre-training step and the at  
349 most 25 000 iterations during the fine-tuning step.

### 350 **Scoring potential novel peptide binding sites**

351 Peptide-agnostic prediction of proteins in the human proteome and the PDB was  
352 performed by providing the model with a protein sequence/structure and a poly-glycine sequence  
353 of length 10 as the peptide. When computing scores using PepNN-Struct, the weight given to the  
354 top  $n$  residue probabilities was 0.97. When computing scores using PepNN-Seq, this weight was  
355 set to 0.99. Pairwise comparisons were done with the distributions of every PFAM domain to

356 remaining domains with a Wilcoxon rank-sum test and multiple testing correction was done  
357 using the Benjamini-Hochberg procedure.

### 358 **Statistical tests**

359 Wilcoxon signed-rank and rank-sum tests were done using the SciPy python library  
360 (Virtanen *et al*, 2020). Multiple testing correction was done using the statsmodels python  
361 package (Seabold & Perktold, 2010). The DeLong test was done using the pROC R package  
362 (Robin *et al*, 2011).

### 363 **Protein-protein docking and molecular dynamics simulations on ORF7a/BST-2**

364 The structure of the SARS-CoV-2 ORF7a encoded accessory protein (PDB ID 6W37)  
365 and mouse BST-2/Tetherin Ectodomain (PDB ID 3NI0 (Swiecki *et al*, 2011)) were used as input  
366 structures for the ClusPro webserver (Kozakov *et al*, 2017; Vajda *et al*, 2017). The top 10 results,  
367 ranked by binding affinity, were retrieved for further analysis. The ClusPro docking poses of the  
368 ORF7a/BST-2 complex were directly used as input to the Charmm-gui webserver (Brooks *et al*,  
369 2009; Jo *et al*, 2008; Lee *et al*, 2016) to set up MD systems. The systems have a size of  
370 approximately  $1803 \text{ \AA}^3$  and a total of  $\sim 570,000$  atoms. To speed up the simulation, a truncated  
371 system was also created. Amino acids after residue 100 in BST-2 were removed, resulting in a  
372 system of size  $\sim 1003 \text{ \AA}^3$  and approximately 91,300 atoms. The energy minimization and MD  
373 simulations were performed with the GROMACS program (Pronk *et al*, 2013) version 2019.3  
374 GPU using the CHARMM36 force field (Klauda *et al*, 2010; Huang & MacKerell Jr, 2013) and  
375 TIP3P water model (Jorgensen *et al*, 1983).

### 376 **Code and data availability**

377 The datasets used in this study and the code to run PepNN are available at

378 <https://gitlab.com/oabdin/pepnn>.

## 379 **References**

- 380 Agrawal P, Singh H, Srivastava HK, Singh S, Kishore G & Raghava GPS (2019) Benchmarking  
381 of different molecular docking methods for protein-peptide docking. *BMC Bioinformatics*  
382 19: 426
- 383 Brooks BR, Brooks III CL, Mackerell Jr. AD, Nilsson L, Petrella RJ, Roux B, Won Y, Archontis  
384 G, Bartels C, Boresch S, *et al* (2009) CHARMM: The biomolecular simulation program. *J*  
385 *Comput Chem* 30: 1545–1614
- 386 Ciemny M, Kurcinski M, Kamel K, Kolinski A, Alam N, Schueler-Furman O & Kmiecik S  
387 (2018) Protein–peptide docking: opportunities and challenges. *Drug Discov Today*  
388 doi:10.1016/j.drudis.2018.05.006 [PREPRINT]
- 389 Consortium TU (2018) UniProt: a worldwide hub of protein knowledge. *Nucleic Acids Res* 47:  
390 D506–D515
- 391 Cunningham JM, Koytiger G, Sorger PK & AlQuraishi M (2020) Biophysical prediction of  
392 protein–peptide interactions and signaling networks using machine learning. *Nat Methods*  
393 17: 175–183
- 394 Elnaggar A, Heinzinger M, Dallago C, Rehawi G, Wang Y, Jones L, Gibbs T, Feher T, Angerer  
395 C, Steinegger M, *et al* (2020) ProtTrans: Towards Cracking the Language of  
396 Life’s Code Through Self-Supervised Deep Learning and High  
397 Performance Computing. *bioRxiv*
- 398 Finn RD, Bateman A, Clements J, Coggill P, Eberhardt RY, Eddy SR, Heger A, Hetherington K,  
399 Holm L, Mistry J, *et al* (2013) Pfam: the protein families database. *Nucleic Acids Res* 42:  
400 D222–D230
- 401 Fu L, Niu B, Zhu Z, Wu S & Li W (2012) CD-HIT: Accelerated for clustering the next-

402 generation sequencing data. *Bioinformatics*

403 Gainza P, Sverrisson F, Monti F, Rodolà E, Boscai D, Bronstein MM & Correia BE (2020)

404 Deciphering interaction fingerprints from protein molecular surfaces using geometric deep

405 learning. *Nat Methods* 17

406 Hagai T, Azia A, Babu MM & Andino R (2014) Use of Host-like Peptide Motifs in Viral

407 Proteins Is a Prevalent Strategy in Host-Virus Interactions. *Cell Rep* 7: 1729–1739

408 Huang J & MacKerell Jr AD (2013) CHARMM36 all-atom additive protein force field:

409 Validation based on comparison to NMR data. *J Comput Chem* 34: 2135–2145

410 Ingraham J, Garg VK, Barzilay R & Jaakkola T (2019) Generative models for graph-based

411 protein design. In *Deep Generative Models for Highly Structured Data, DGS@ICLR 2019*

412 *Workshop*

413 Iqbal S & Hoque MT (2018) PBRpredict-Suite: a suite of models to predict peptide-recognition

414 domain residues from protein sequence. *Bioinformatics* 34: 3289–3299

415 Jadwin JA, Ogiue-Ikeda M & Machida K (2012) The application of modular protein domains in

416 proteomics. *FEBS Lett* 586: 2586–2596

417 Jo S, Kim T, Iyer VG & Im W (2008) CHARMM-GUI: A web-based graphical user interface for

418 CHARMM. *J Comput Chem* 29: 1859–1865

419 Johansson-Åkhe I, Mirabello C & Wallner B (2019) Predicting protein-peptide interaction sites

420 using distant protein complexes as structural templates. *Sci Rep* 9

421 Jones P, Binns D, Chang HY, Fraser M, Li W, McAnulla C, McWilliam H, Maslen J, Mitchell

422 A, Nuka G, *et al* (2014) InterProScan 5: Genome-scale protein function classification.

423 *Bioinformatics*

424 Jorgensen WL, Chandrasekhar J, Madura JD, Impey RW & Klein ML (1983) Comparison of

- 425 simple potential functions for simulating liquid water. *J Chem Phys* 79: 926–935
- 426 Joshi R, Qin L, Cao X, Zhong S, Voss C, Min W & Li SSC (2020) {D}{L}{C}1 {S}{A}{M}
- 427 domain-binding peptides inhibit cancer cell growth and migration by inactivating
- 428 {R}ho{A}. *J Biol Chem* 295: 645–656
- 429 Klauda JB, Venable RM, Freites JA, O'Connor JW, Tobias DJ, Mondragon-Ramirez C,
- 430 Vorobyov I, MacKerell AD & Pastor RW (2010) Update of the CHARMM All-Atom
- 431 Additive Force Field for Lipids: Validation on Six Lipid Types. *J Phys Chem B* 114: 7830–
- 432 7843
- 433 Kozakov D, Hall DR, Xia B, Porter KA, Padhorny D, Yueh C, Beglov D & Vajda S (2017) The
- 434 ClusPro web server for protein--protein docking. *Nat Protoc* 12: 255–278
- 435 Krumm BE & Grisshammer R (2015) Peptide ligand recognition by G protein-coupled receptors.
- 436 *Front Pharmacol* 6: 48
- 437 Lee J, Cheng X, Swails JM, Yeom MS, Eastman PK, Lemkul JA, Wei S, Buckner J, Jeong JC,
- 438 Qi Y, *et al* (2016) CHARMM-GUI Input Generator for NAMD, GROMACS, AMBER,
- 439 OpenMM, and CHARMM/OpenMM Simulations Using the CHARMM36 Additive Force
- 440 Field. *J Chem Theory Comput* 12: 405–413
- 441 Lei Y, Li S, Liu Z, Wan F, Tian T, Li S, Zhao D & Zeng J (2020) CAMP: a Convolutional
- 442 Attention-based Neural Network for Multifaceted Peptide-protein Interaction Prediction.
- 443 *bioRxiv*
- 444 London N, Raveh B, Movshovitz-Attias D & Schueler-Furman O (2010) Can self-inhibitory
- 445 peptides be derived from the interfaces of globular protein-protein interactions? *Proteins*
- 446 *Struct Funct Bioinforma*
- 447 London N, Raveh B & Schueler-Furman O (2012) Modeling Peptide--Protein Interactions. In

- 448 *Homology Modeling: Methods and Protocols*, Orry AJW & Abagyan R (eds) pp 375–398.  
449 Totowa, NJ: Humana Press
- 450 Mitternacht S (2016) FreeSASA: An open source C library for solvent accessible surface area  
451 calculations. *F1000Research*
- 452 Mohan A, Oldfield CJ, Radivojac P, Vacic V, Cortese MS, Dunker AK & Uversky VN (2006)  
453 Analysis of Molecular Recognition Features (MoRFs). *J Mol Biol* 362
- 454 Pronk S, Páll S, Schulz R, Larsson P, Bjelkmar P, Apostolov R, Shirts MR, Smith JC, Kasson  
455 PM, van der Spoel D, *et al* (2013) GROMACS 4.5: a high-throughput and highly parallel  
456 open source molecular simulation toolkit. *Bioinformatics* 29: 845–854
- 457 Rao R, Bhattacharya N, Thomas N, Duan Y, Chen X, Canny JF, Abbeel P & Song YS (2019)  
458 Evaluating Protein Transfer Learning with {TAPE}. *CoRR* abs/1906.0
- 459 Raveh B, London N & Schueler-Furman O (2010) Sub-angstrom modeling of complexes  
460 between flexible peptides and globular proteins. *Proteins Struct Funct Bioinforma* 78:  
461 2029–2040
- 462 Robin X, Turck N, Hainard A, Tiberti N, Lisacek F, Sanchez J-C & Müller M (2011) pROC: an  
463 open-source package for R and S+ to analyze and compare ROC curves. *BMC*  
464 *Bioinformatics* 12: 77
- 465 Seabold S & Perktold J (2010) Statsmodels: econometric and statistical modeling with Python. In  
466 *9th Python in Science Conference*
- 467 Sedan Y, Marcu O, Lyskov S & Schueler-Furman O (2016) Peptiderive server: derive peptide  
468 inhibitors from protein-protein interactions. *Nucleic Acids Res*
- 469 Senior AW, Evans R, Jumper J, Kirkpatrick J, Sifre L, Green T, Qin C, Židek A, Nelson AWR,  
470 Bridgland A, *et al* (2020) Improved protein structure prediction using potentials from deep

- 471 learning. *Nature* 577: 706–710
- 472 Strokach A, Becerra D, Corbi-Verge C, Perez-Riba A & Kim PM (2020) Fast and Flexible  
473 Protein Design Using Deep Graph Neural Networks. *Cell Syst* 11: 402-411.e4
- 474 Swiecki M, Scheaffer SM, Allaire M, Fremont DH, Colonna M & Brett TJ (2011) Structural and  
475 biophysical analysis of BST-2/tetherin ectodomains reveals an evolutionary conserved  
476 design to inhibit virus release. *J Biol Chem* 286: 2987–2997
- 477 Taherzadeh G, Yang Y, Zhang T, Liew AW-C & Zhou Y (2016) Sequence-based prediction of  
478 protein–peptide binding sites using support vector machine. *J Comput Chem* 37: 1223–1229
- 479 Taherzadeh G, Zhou Y, Liew AW-C & Yang Y (2017) Structure-based prediction of protein–  
480 peptide binding regions using Random Forest. *Bioinformatics* 34: 477–484
- 481 Taherzadeh G, Zhou Y, Liew AWC & Yang Y (2018) Structure-based prediction of protein-  
482 peptide binding regions using Random Forest. *Bioinformatics* 34
- 483 Taylor JK, Coleman CM, Postel S, Sisk JM, Bernbaum JG, Venkataraman T, Sundberg EJ &  
484 Frieman MB (2015) Severe Acute Respiratory Syndrome Coronavirus ORF7a Inhibits Bone  
485 Marrow Stromal Antigen 2 Virion Tethering through a Novel Mechanism of Glycosylation  
486 Interference. *J Virol* 89: 11820–11833
- 487 Tompa P, Davey NE, Gibson TJ & Babu MM (2014) A Million peptide motifs for the molecular  
488 biologist. *Mol Cell* doi:10.1016/j.molcel.2014.05.032 [PREPRINT]
- 489 Vajda S, Yueh C, Beglov D, Bohnuud T, Mottarella SE, Xia B, Hall DR & Kozakov D (2017)  
490 New additions to the ClusPro server motivated by CAPRI. *Proteins* 85: 435–444
- 491 Vaswani A, Shazeer N, Parmar N, Uszkoreit J, Jones L, Gomez AN, Kaiser Ł & Polosukhin I  
492 (2017) Attention is all you need. In *Advances in Neural Information Processing Systems*
- 493 Virtanen P, Gommers R, Oliphant TE, Haberland M, Reddy T, Cournapeau D, Burovski E,

494 Peterson P, Weckesser W, Bright J, *et al* (2020) SciPy 1.0: fundamental algorithms for  
495 scientific computing in Python. *Nat Methods* 17

496 Wardah W, Dehzangi A, Taherzadeh G, Rashid MA, Khan MGM, Tsunoda T & Sharma A  
497 (2020) Predicting protein-peptide binding sites with a deep convolutional neural network. *J*  
498 *Theor Biol* 496

499 Weng G, Gao J, Wang Z, Wang E, Hu X, Yao X, Cao D & Hou T (2020) Comprehensive  
500 Evaluation of Fourteen Docking Programs on Protein–Peptide Complexes. *J Chem Theory*  
501 *Comput* 16: 3959–3969

502 Wollscheid B, Bausch-Fluck D, Henderson C, O’Brien R, Bibel M, Schiess R, Aebersold R &  
503 Watts JD (2009) Mass-spectrometric identification and relative quantification of N-linked  
504 cell surface glycoproteins. *Nat Biotechnol* 27

505 Xia C, Li J, Su J & Tian Y (2019) Exploring Reciprocal Attention for Salient Object Detection  
506 by Cooperative Learning. [PREPRINT]

507 Yang F, Petsalaki E, Rolland T, Hill DE, Vidal M & Roth FP (2015) Protein Domain-Level  
508 Landscape of Cancer-Type-Specific Somatic Mutations. *PLOS Comput Biol* 11: 1–30

509 Zhao Z, Peng Z & Yang J (2018) Improving Sequence-Based Prediction of Protein-Peptide  
510 Binding Residues by Introducing Intrinsic Disorder and a Consensus Method. *J Chem Inf*  
511 *Model* 58

512



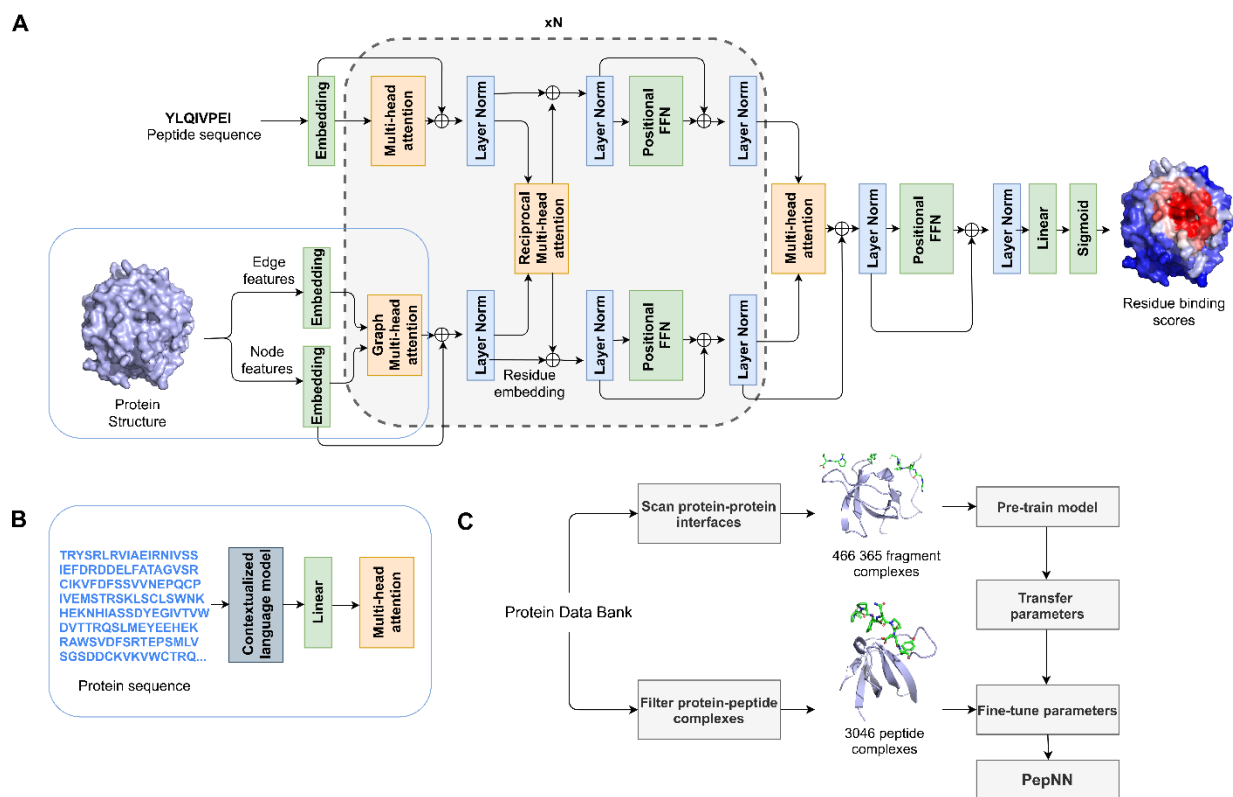

513

514 **Figure 1:** Model architecture and training procedure. A) Attention layers are indicated with

515 orange, normalization layers are indicated with blue and simple transformation layers are

516 indicated with green. B) Input layers for PepNN-Seq. C) Transfer learning pipeline used for

517 model training.

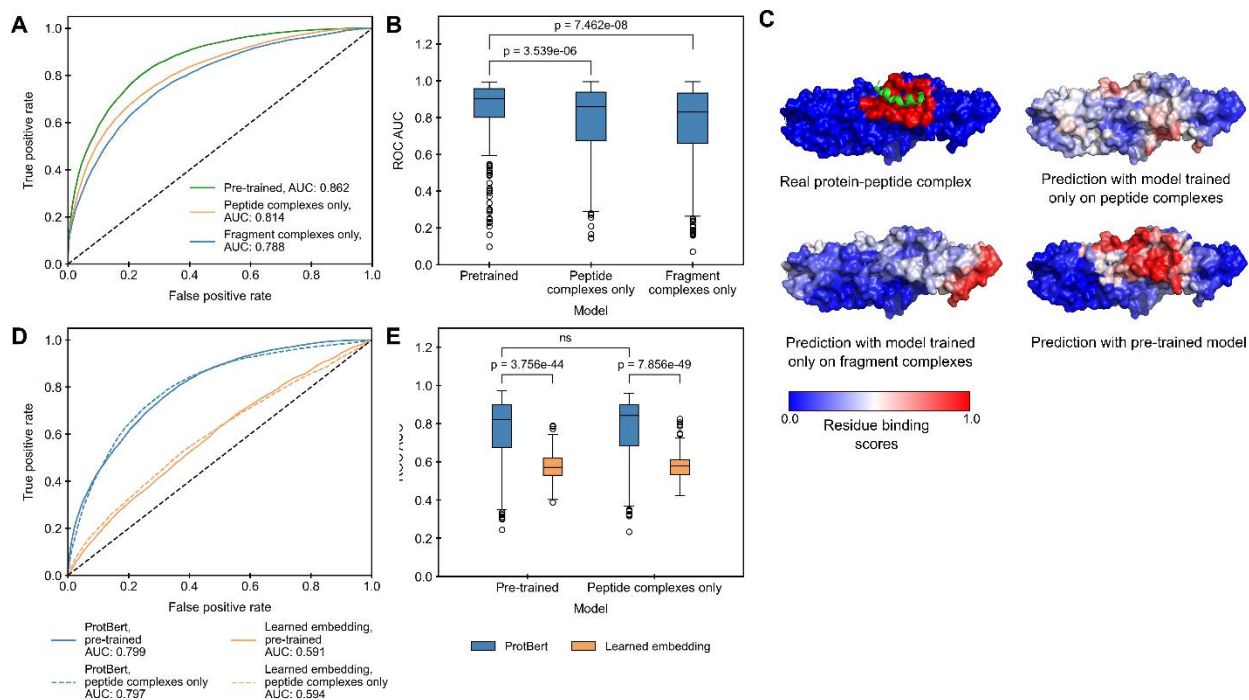

518

519 **Figure 2:** Impact of transfer learning on model performance on the peptide complex validation  
520 dataset. A) ROC curves on all residues in the dataset using predictions from PepNN-Struct  
521 trained on different datasets. B) Comparison of the distribution of ROC AUCs on different input  
522 proteins using predictions from PepNN-Struct with different training procedures and sequence  
523 embeddings (Wilcoxon signed-rank test). C) Predictions of the binding site of the Bro domain of  
524 HD-PTP (PDB code 5CRV) using PepNN-Struct trained on different datasets. D) ROC curves on  
525 all residues in the dataset using predictions from the sequence model with different training  
526 procedures and sequence embeddings. E) Comparison of the distribution of ROC AUCs on  
527 different input proteins using predictions from PepNN-Seq trained on different datasets  
528 (Wilcoxon signed-rank test).

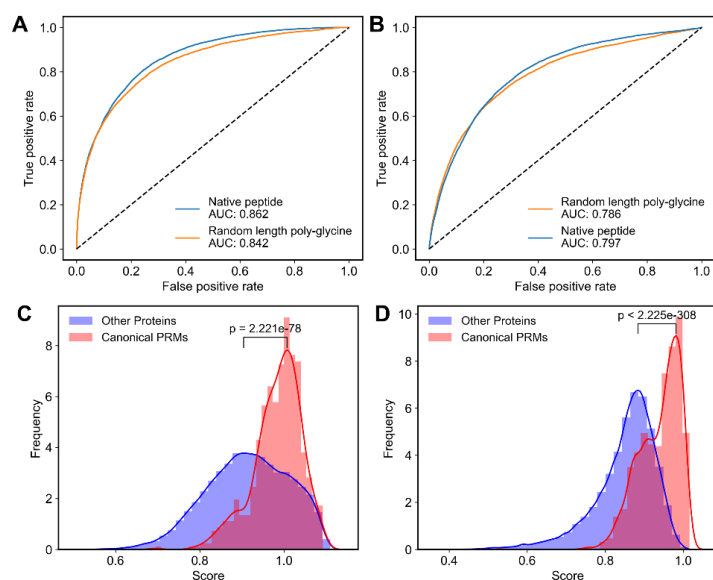

529

530 **Figure 3:** Peptide-agnostic binding site prediction using PepNN-Struct and PepNN-Seq. A) ROC  
531 curves on the validation dataset using PepNN-Struct with different input peptide sequences. B)  
532 ROC curves on the validation dataset using PepNN-Seq with different input peptide sequences.  
533 C) Scores assigned by PepNN-Struct to different domains in the PDB (Wilcoxon rank-sum test).  
534 D) Scores assigned by the PepNN-Seq to different domains in the reference human proteome  
535 (Wilcoxon rank-sum test).

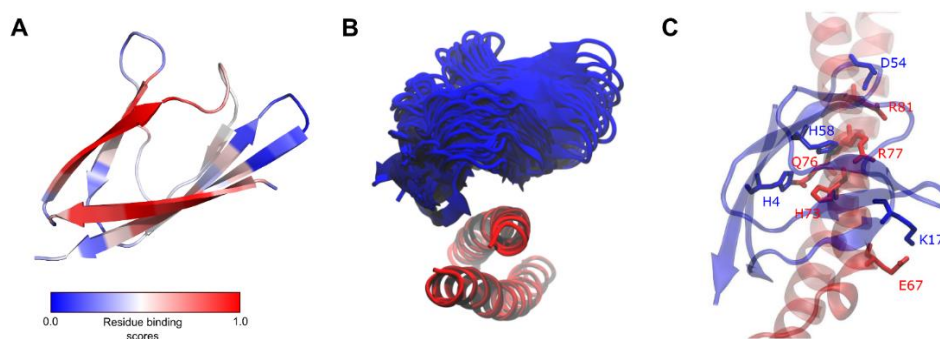

536

537 **Figure 4:** A) ORF7a peptide binding site prediction. B) Ensemble plot of putative ORF7a/BST-2  
538 complex from a 300 ns MD simulation. C) Hydrogen bonds between residues at the BST/ORF7a  
539 interface in the predicted complex

540

541 **Table 1:** Comparison of the developed model to existing approaches

| Test dataset | Training dataset size | Model                                         | ROC AUC      | MCC          |
|--------------|-----------------------|-----------------------------------------------|--------------|--------------|
| TS305        | 2394                  | PepNN-Struct                                  | <b>0.893</b> | <b>0.483</b> |
|              |                       | PepNN-Seq                                     | 0.859        | 0.401        |
|              | 475                   | PBRpredict-flexible (Iqbal & Hoque, 2018)     | 0.653        | 0.139        |
|              |                       | PBRpredict-moderate (Iqbal & Hoque, 2018)     | 0.620        | 0.127        |
|              |                       | PBRpredict-strict (Iqbal & Hoque, 2018)       | 0.598        | 0.100        |
| TS251        | 251                   | PepNN-Struct                                  | <b>0.817</b> | <b>0.370</b> |
|              |                       | PepNN-Seq                                     | 0.758        | 0.278        |
|              |                       | Interpep (Johansson-Åkhe <i>et al</i> , 2019) | <b>0.793</b> | ---          |
| TS639        | 640                   | PepNN-Struct                                  | <b>0.838</b> | 0.301        |
|              |                       | PepNN-Seq                                     | 0.792        | 0.251        |
|              |                       | PepBind (Zhao <i>et al</i> , 2018)            | 0.767        | <b>0.348</b> |
| TS125        | 640                   | PepNN-Struct                                  | <b>0.841</b> | 0.321        |
|              |                       | PepNN-Seq                                     | 0.805        | 0.278        |
|              |                       | PepBind (Zhao <i>et al</i> , 2018)            | 0.793        | <b>0.372</b> |
|              | 1156                  | SPRINT-Str (Taherzadeh <i>et al</i> , 2017)   | 0.780        | 0.290        |
|              | 1199                  | SPRINT-Seq (Taherzadeh <i>et al</i> , 2016)   | 0.680        | 0.200        |
|              | 1004                  | Visual (Wardah <i>et al</i> , 2020)           | 0.730        | 0.170        |

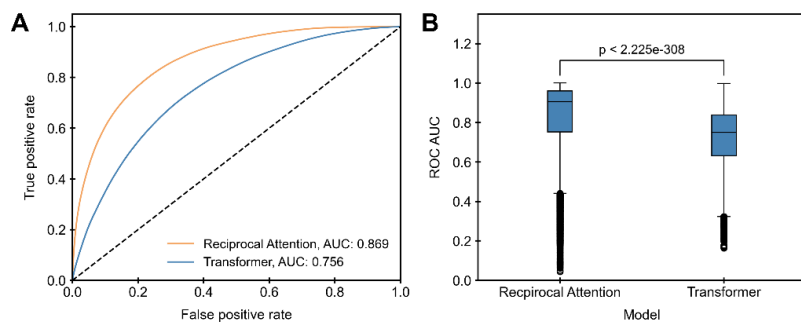

543

544 **Supplementary Figure 1:** Comparison of the performance of the developed model to a  
545 Transformer with the same hyperparameters on the fragment complex validation dataset. A)  
546 ROC curves on all residues in the dataset. B) Comparison of distribution of ROC AUCs on  
547 different input proteins (Wilcoxon signed-rank test).

548

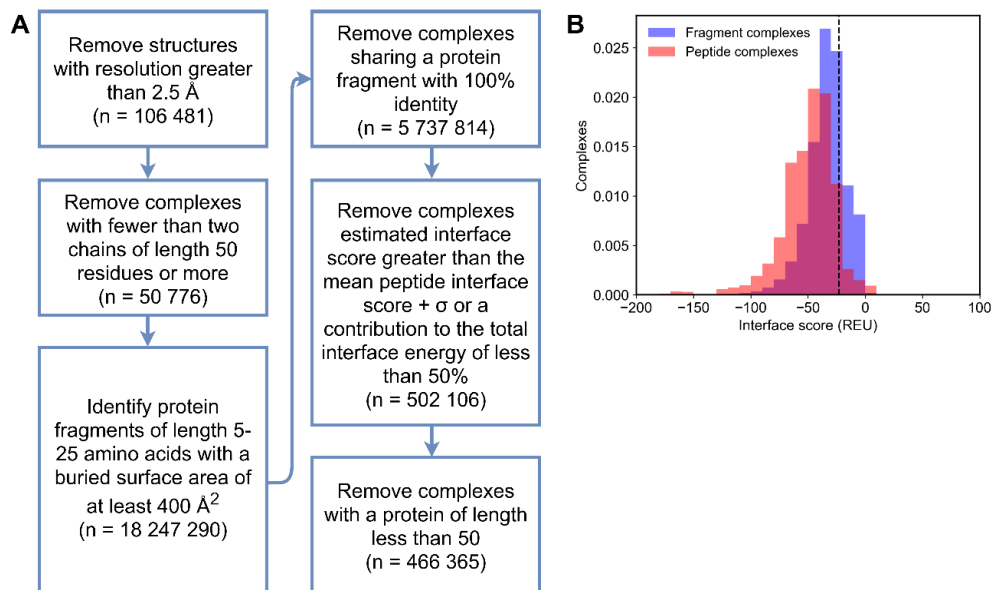

549

550 **Supplementary Figure 2:** A) Curation pipeline for generation of a protein fragment-protein  
551 dataset. B) Comparison of estimated interface distribution for the all fragment-protein complexes  
552 and the dataset of peptide-protein complexes. The dashed lines indicates the threshold used for  
553 filtering fragment-protein complexes.

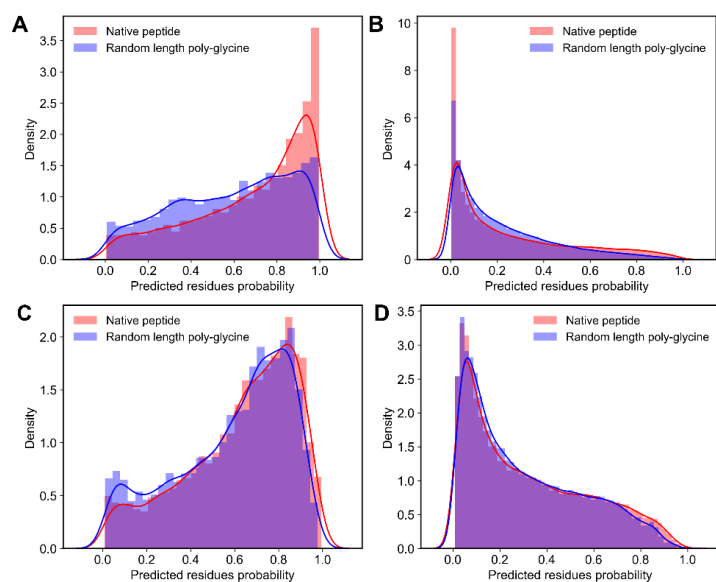

554

555 **Supplementary Figure 3:** Probabilities assigned by PepNN-Struct and PepNN-Seq to different  
556 models residues with and without the native peptide sequence. A) Probabilities assigned by  
557 PepNN-Struct to binding residues. B) Probabilities assigned by PepNN-Struct to non-binding  
558 residues. C) Probabilities assigned by PepNN-Seq to binding residues. D) Probabilities assigned  
559 by PepNN-Seq to non-binding residues.

560

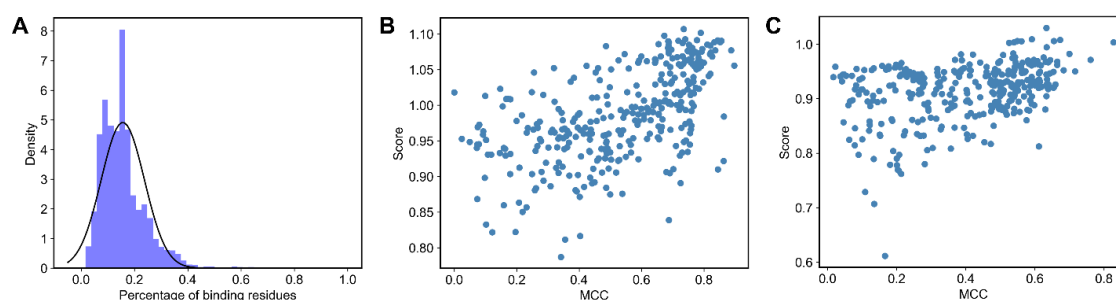

561

562 **Supplementary Figure 4:** A) The percentage of binding residues in different examples in the  
563 training dataset. B) Relationship between scores assigned by PepNN-Struct and MCC of  
564 predictions. C) Relationship between scores assigned by PepNN-Seq and MCC of predictions.

565

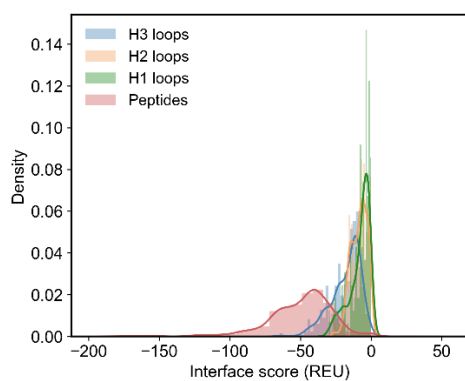

566

567 **Supplementary Figure 5:** Comparison of estimated interface energies for peptide-protein  
568 complexes and CDR-protein complexes.

569

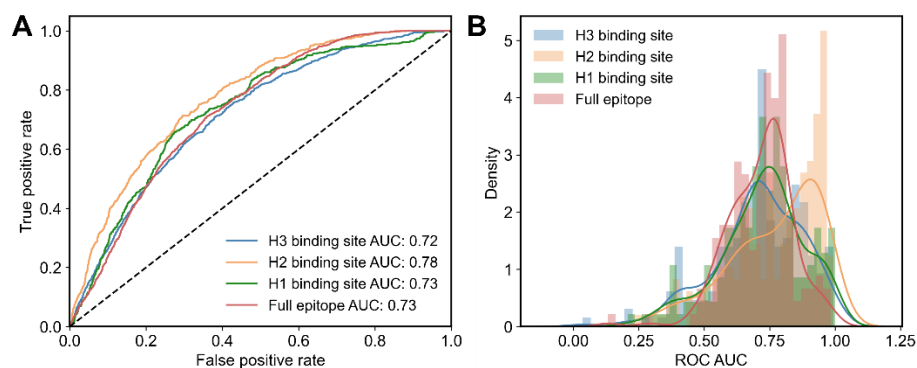

570

571 **Supplementary Figure 6:** Performance of PepNN on the task of epitope prediction. A) ROC  
572 curves on all residues in the test dataset. B) Distribution of ROC AUC for different input  
573 antigens from the test set.
